# Supplementary material for: Phylogenetic Distinctiveness of Middle Eastern and Southeast Asian Village Dog Y Chromosomes Illuminates Dog Origins
Source: PLoS One. 2011 Dec 14;6(12):e28496. doi: 10.1371/journal.pone.0028496 (PMC3237445; doi:10.1371/journal.pone.0028496)
Supplement: Table S9 — Frequency of NRY STR and SNP haplotypes observed in Middle Eastern and Southeast Asian village dog populations, Australian Dingoes, breed dogs (including published onesa), and gray wolves. An asterix identifies a SNP haplotype with one or more positions imputed (see Table S7). (DOCX) [file pone.0028496.s011.docx]

Table S9.Frequency of NRY STR and SNP haplotypes observed in Middle Eastern and Southeast Asian village dog populations, Australian Dingoes, breed dogs (including published onesa), and gray wolves. An asterix identifies a SNP haplotype with one or more positions imputed (see Table S7).

| STR haplotype | SNP haplotype | Bali | Brunei | Iran | Thailand | Taiwan | Philippines | Israeli Saluki | Dingo | Breed | Published Breeda | Wolf |
| --- | --- | --- | --- | --- | --- | --- | --- | --- | --- | --- | --- | --- |
| 0a | 1/2/3/4 | 2 | -- | -- | -- | -- | -- | -- | -- | -- | -- | -- |
| 0b | 1/2/3/4 | 5 | -- | -- | -- | -- | -- | -- | -- | -- | -- | -- |
| 0c | 1/2/3/4* | 3 | -- | -- | -- | -- | -- | -- | -- | -- | -- | -- |
| 0d | 1/2/3/4* | 2 | -- | -- | -- | -- | -- | -- | -- | -- | -- | -- |
| 0e | 1/2/3/4 | 2 | -- | -- | -- | -- | -- | -- | -- | -- | -- | -- |
| 0f | 1/2/3/4 | 4 | -- | -- | -- | -- | -- | -- | -- | 3 | -- | -- |
| 0g | 1/2/3/4 | 1 | -- | -- | -- | -- | -- | -- | -- | -- | -- | -- |
| 0h | 1/2/3/4 | 3 | -- | -- | -- | -- | -- | -- | -- | -- | -- | -- |
| 0i | 1/2/3/4* | 9 | -- | -- | -- | -- | -- | -- | -- | -- | -- | -- |
| 0j | 1/2/3/4 | 5 | -- | -- | -- | -- | -- | -- | -- | -- | -- | -- |
| 0k | 1/2/3/4 | 1 | -- | -- | -- | -- | -- | -- | -- | -- | -- | -- |
| 0l | 1/2/3/4 | 2 | -- | -- | -- | -- | -- | -- | -- | -- | -- | -- |
| 0m | 6 | 4 | -- | 1 | -- | -- | -- | -- | -- | -- | -- | -- |
| 0n | 6 | 18 | -- | -- | 1 | -- | -- | -- | -- | -- | -- | -- |
| 0o | 6 | 5 | -- | -- | -- | -- | -- | -- | -- | -- | -- | -- |
| 0p | 6 | 1 | -- | -- | -- | -- | -- | -- | -- | -- | -- | -- |
| 0q | 6 | 1 | 2 | -- | -- | -- | -- | -- | -- | -- | -- | -- |
| 10a | 11* | -- | -- | -- | -- | -- | -- | 6 | -- | -- | -- | -- |
| 10d | 11 | -- | -- | 1 | -- | -- | -- | -- | -- | -- | -- | -- |
| 10e | 11 | -- | -- | 1 | -- | -- | -- | -- | -- | -- | -- | -- |
| 10f | 11 | -- | -- | 2 | -- | -- | -- | -- | -- | -- | -- | -- |
| 10g | 11 | -- | -- | 8 | -- | -- | -- | -- | -- | -- | -- | -- |
| STR haplotype | SNP haplotype | Bali | Brunei | Iran | Thailand | Taiwan | Philippines | Israeli Saluki | Dingo | Breed | Published Breeda | Wolf |
| 10h | 7 | -- | -- | -- | -- | 1 | -- | -- | -- | -- | -- | -- |
| 10i | 1/2/3/4 | -- | -- | -- | -- | 1 | -- | -- | -- | -- | -- | -- |
| 10m | 8 | -- | -- | 3 | -- | -- | -- | -- | -- | -- | -- | -- |
| 10n | 8 | -- | -- | 1 | -- | -- | -- | -- | -- | -- | -- | -- |
| 10p | 1/2/3/4 | -- | 1 | -- | -- | -- | -- | -- | -- | -- | -- | -- |
| 10q | 6 | -- | -- | 1 | -- | -- | -- | -- | -- | -- | -- | -- |
| 10s | 6 | -- | -- | 1 | -- | -- | -- | -- | -- | -- | -- | -- |
| 10t | 6 | -- | 5 | -- | -- | -- | -- | -- | -- | -- | -- | -- |
| 10u | 6 | -- | -- | -- | 9 | -- | -- | -- | -- | -- | -- | -- |
| 11a | 1/2/3/4 | -- | -- | -- | -- | -- | -- | -- | -- | 1 | -- | -- |
| 11b | 11 | -- | -- | 1 | -- | -- | -- | -- | -- | -- | -- | -- |
| 11c | 1/2/3/4 | -- | -- | -- | -- | -- | 3 | -- | -- | -- | -- | -- |
| 11d | 10 | -- | -- | -- | -- | -- | -- | -- | -- | -- | -- | 3 |
| 11e | 1/2/3/4 | -- | -- | -- | -- | -- | 2 | -- | -- | -- | -- | -- |
| 11f | 1/2/3/4 | -- | -- | -- | -- | -- | -- | -- | -- | 1 | -- | -- |
| 11g | 1/2/3/4 | -- | -- | 1 | 1 | -- | -- | -- | -- | -- | -- | -- |
| 11i | 11 | -- | -- | -- | -- | -- | -- | -- | -- | -- | -- | 1 |
| 11k | 12 | -- | -- | -- | -- | -- | -- | -- | -- | -- | -- | 1 |
| 11p | 1/2/3/4 | -- | -- | -- | -- | -- | 1 | -- | -- | -- | -- | -- |
| 11q | 1/2/3/4 | -- | -- | -- | -- | -- | 1 | -- | -- | -- | -- | -- |
| 12a | 1/2/3/4 | -- | -- | -- | -- | -- | 1 | -- | -- | -- | -- | -- |
| 12b | 5 | -- | -- | -- | -- | -- | 1 | -- | -- | -- | -- | -- |
| 12c | 1/2/3/4 | -- | -- | 1 | -- | -- | -- | -- | 2 | -- | -- | -- |
| 12d | 1/2/3/4 | -- | -- | -- | -- | -- | -- | -- | -- | 2 | -- | -- |
| 12e | 1/2/3/4 | -- | -- | -- | 1 | -- | 2 | -- | -- | -- | -- | -- |
| 12g | 10 | -- | -- | -- | -- | -- | -- | -- | -- | -- | -- | 1 |
| STR haplotype | SNP haplotype | Bali | Brunei | Iran | Thailand | Taiwan | Philippines | Israeli Saluki | Dingo | Breed | Published Breeda | Wolf |
| 12o | 10 | -- | -- | -- | -- | -- | -- | -- | -- | -- | -- | 1 |
| 1c | 1/2/3/4 | -- | -- | -- | 5 | 2 | 1 | -- | -- | 2 | -- | -- |
| 1d | 1/2/3/4 | 2 | -- | -- | -- | -- | -- | -- | -- | -- | -- | -- |
| 3a | -- | -- | -- | -- | -- | -- | -- | -- | -- | -- | 7 | -- |
| 3b | -- | -- | -- | -- | -- | -- | -- | -- | -- | -- | 3 | -- |
| 3c | -- | -- | -- | -- | -- | -- | -- | -- | -- | -- | 11 | -- |
| 3d | -- | -- | -- | -- | -- | -- | -- | -- | -- | -- | 2 | -- |
| 3e | -- | -- | -- | -- | -- | -- | -- | -- | -- | -- | 5 | -- |
| 3g | -- | -- | -- | -- | -- | -- | -- | -- | -- | -- | 3 | -- |
| 3h | -- | -- | -- | -- | -- | -- | -- | -- | -- | -- | 16 | -- |
| 3i | -- | -- | -- | -- | -- | -- | -- | -- | -- | -- | 5 | -- |
| 4a | -- | -- | -- | -- | -- | -- | -- | -- | -- | -- | 8 | -- |
| 4b | -- | -- | -- | -- | -- | -- | -- | -- | -- | -- | 3 | -- |
| 4c | -- | -- | -- | -- | -- | -- | -- | -- | -- | -- | 1 | -- |
| 4d | -- | -- | -- | -- | -- | -- | -- | -- | -- | -- | 11 | -- |
| 4e | -- | -- | -- | -- | -- | -- | -- | -- | -- | -- | 2 | -- |
| 4f | -- | -- | -- | -- | -- | -- | -- | -- | -- | -- | 3 | -- |
| 4g | -- | -- | -- | -- | -- | -- | -- | -- | -- | -- | 1 | -- |
| 4h | -- | -- | -- | -- | -- | -- | -- | -- | -- | -- | 1 | -- |
| 4i | -- | -- | -- | -- | -- | -- | -- | -- | -- | -- | 2 | -- |
| 4j | -- | -- | -- | -- | -- | -- | -- | -- | -- | -- | 3 | -- |
| 4k | -- | -- | -- | -- | -- | -- | -- | -- | -- | -- | 1 | -- |
| 6a | -- | -- | -- | -- | -- | -- | -- | -- | -- | -- | 5 | -- |
| 6b | -- | -- | -- | -- | -- | -- | -- | -- | -- | -- | 3 | -- |
| 6c | -- | -- | -- | -- | -- | -- | -- | -- | -- | -- | 1 | -- |
| 6d | 1/2/3/4* | -- | 1 | -- | -- | -- | -- | -- | -- | 1 | 24 | -- |
| STR haplotype | SNP haplotype | Bali | Brunei | Iran | Thailand | Taiwan | Philippines | Israeli Saluki | Dingo | Breed | Published Breeda | Wolf |
| 6e | -- | -- | -- | -- | -- | -- | -- | -- | -- | -- | 25 | -- |
| 6f | -- | -- | -- | -- | -- | -- | -- | -- | -- | -- | 23 | -- |
| 6g | 1/2/3/4 | -- | 3 | -- | 2 | -- | -- | -- | -- | 6 | 4 | -- |
| 6h | 1/2/3/4 | 1 | -- | -- | -- | 1 | -- | -- | -- | -- | 15 | -- |
| 6i | -- | -- | -- | -- | -- | -- | -- | -- | -- | -- | 1 | -- |
| 6j | -- | -- | -- | -- | -- | -- | -- | -- | -- | -- | 1 | -- |
| 6k | -- | -- | -- | -- | -- | -- | -- | -- | -- | -- | 18 | -- |
| 6l | 5 | -- | -- | 1 | -- | -- | -- | -- | -- | 1 | 5 | -- |
| 6m | -- | -- | -- | -- | -- | -- | -- | -- | -- | -- | 1 | -- |
| 6o | 11 | -- | -- | 1 | -- | -- | -- | -- | -- | -- | 1 | -- |
| 6p | 1/2/3/4 | -- | 2 | 1 | 4 | 5 | 1 | -- | -- | -- | 36 | -- |
| 6q | 1/2/3/4 | -- | -- | -- | -- | -- | -- | -- | 1 | 5 | 36 | -- |
| 6r | 1/2/3/4 | -- | -- | 5 | -- | -- | -- | -- | -- | 1 | 28 | -- |
| 6s | -- | -- | -- | -- | -- | -- | -- | -- | -- | -- | 1 | -- |
| 6t | 1/2/3/4 | -- | -- | -- | -- | -- | -- | -- | -- | 16 | 6 | -- |
| 6u | 1/2/3/4 | -- | -- | -- | 2 | -- | -- | -- | -- | -- | 11 | -- |
| 6v | -- | -- | -- | -- | -- | -- | -- | -- | -- | -- | 2 | -- |
| 6w | -- | -- | -- | -- | -- | -- | -- | -- | -- | -- | 1 | -- |
| 6x | -- | -- | -- | -- | -- | -- | -- | -- | -- | -- | 11 | -- |
| 6y | -- | -- | -- | -- | -- | -- | -- | -- | -- | -- | 2 | -- |
| 6z | -- | -- | -- | -- | 1 | -- | -- | -- | -- | -- | 14 | -- |
| 6za | -- | -- | -- | -- | -- | -- | -- | -- | -- | 1 | 4 | -- |
| 6zb | -- | -- | -- | -- | -- | -- | -- | -- | -- | -- | 2 | -- |
| 6zc | -- | -- | -- | -- | -- | -- | -- | -- | -- | -- | 9 | -- |
| 6zd | -- | -- | -- | -- | -- | -- | -- | -- | -- | -- | 3 | -- |
| 6ze | -- | -- | -- | -- | -- | -- | -- | -- | -- | -- | 5 | -- |
| STR haplotype | SNP haplotype | Bali | Brunei | Iran | Thailand | Taiwan | Philippines | Israeli Saluki | Dingo | Breed | Published Breeda | Wolf |
| 6zf | 1/2/3/4 | -- | -- | -- | -- | -- | -- | -- | -- | 1 | 1 | -- |
| 6zg | -- | -- | -- | -- | -- | -- | -- | -- | -- | -- | 27 | -- |
| 6zh | 1/2/3/4 | -- | -- | -- | -- | -- | -- | -- | -- | 7 | 87 | -- |
| 6zi | 1/2/3/4 | -- | 1 | -- | -- | 1 | 2 | -- | -- | 6 | 2 | -- |
| 6zj | -- | -- | -- | -- | -- | -- | -- | -- | -- | -- | 1 | -- |
| 7a | -- | -- | -- | -- | -- | -- | -- | -- | -- | -- | 71 | -- |
| 7b | -- | -- | -- | -- | -- | -- | -- | -- | -- | -- | 12 | -- |
| 7c | -- | -- | -- | -- | -- | -- | -- | -- | -- | -- | 38 | -- |
| 7d | 1/2/3/4 | -- | 3 | -- | 1 | 3 | -- | -- | 1 | 3 | 119 | -- |
| 7e | 1/2/3/4 | -- | -- | -- | -- | -- | -- | -- | -- | 1 | 62 | -- |
| 7f | -- | -- | -- | -- | 1 | -- | -- | -- | -- | -- | 12 | -- |
| 8a | 1/2/3/4 | -- | -- | -- | -- | 1 | -- | -- | -- | -- | -- | -- |
| 8d | 1/2/3/4 | -- | 1 | -- | -- | -- | -- | -- | -- | 10 | -- | -- |
| 8f | 5 | -- | -- | -- | -- | 2 | -- | -- | -- | -- | -- | -- |
| 8h | 11 | -- | -- | 2 | -- | -- | -- | 3 | -- | -- | -- | -- |
| 8i | 11 | -- | -- | 10 | -- | -- | -- | 3 | -- | 3 | -- | -- |
| 8j | 11 | -- | -- | 3 | -- | -- | -- | 1 | -- | -- | -- | -- |
| 8k | 11 | -- | -- | 1 | -- | -- | -- | -- | -- | -- | -- | -- |
| 8l | 11 | -- | -- | 1 | -- | -- | -- | -- | -- | -- | -- | -- |
| 8m | 11 | -- | -- | 7 | -- | -- | -- | -- | -- | -- | -- | -- |
| 8n | 11 | -- | -- | 15 | -- | -- | -- | 2 | -- | -- | -- | -- |
| 8o | 11 | -- | -- | 1 | -- | -- | -- | -- | -- | -- | -- | -- |
| 8p | 11 | -- | -- | 1 | -- | -- | -- | -- | -- | -- | -- | -- |
| 8q | 11 | -- | -- | 2 | -- | -- | -- | -- | -- | -- | -- | -- |
| 8r | 11 | -- | -- | 4 | -- | -- | -- | -- | -- | -- | -- | -- |
| 8s | 11 | -- | -- | 3 | -- | -- | -- | -- | -- | -- | -- | -- |
| STR haplotype | SNP haplotype | Bali | Brunei | Iran | Thailand | Taiwan | Philippines | Israeli Saluki | Dingo | Breed | Published Breeda | Wolf |
| 8t | 11 | -- | -- | 1 | -- | -- | -- | -- | -- | -- | -- | -- |
| 8v | 1/2/3/4 | -- | -- | -- | -- | 1 | -- | -- | -- | -- | -- | -- |
| 8y | 8 | -- | -- | 4 | -- | -- | -- | -- | -- | -- | -- | -- |
| 9c | 1/2/3/4 | -- | -- | -- | 1 | -- | -- | -- | -- | 4 | -- | -- |
| 9d | 1/2/3/4 | -- | 2 | -- | -- | -- | 1 | -- | -- | -- | -- | -- |
| 9e | 11 | -- | -- | 1 | -- | -- | -- | -- | -- | -- | -- | -- |
| 9f | 11 | -- | -- | 1 | -- | -- | -- | -- | -- | -- | -- | -- |
| 9g | 8 | -- | -- | 1 | -- | -- | -- | 7 | -- | -- | -- | -- |
| 9h | 1/2/3/4* | -- | -- | 1 | -- | -- | -- | -- | -- | -- | -- | -- |
| 9i | 1/2/3/4 | -- | -- | 2 | -- | -- | -- | -- | -- | -- | -- | -- |
| 9j | 8 | -- | -- | -- | 1 | -- | -- | -- | -- | -- | -- | -- |
| 9k | 1/2/3/4 | -- | -- | -- | -- | -- | -- | -- | 1 | -- | -- | -- |
| 9l | 11 | -- | -- | 2 | -- | -- | -- | -- | -- | -- | -- | -- |
| 9m | 11 | -- | -- | 1 | -- | -- | -- | -- | -- | -- | -- | -- |
| 9n | 10 | -- | -- | 1 | -- | -- | -- | -- | -- | -- | -- | -- |
| 9o | 8* | -- | -- | -- | -- | -- | -- | 1 | -- | -- | -- | -- |
| 9p | 7 | -- | -- | 1 | -- | -- | -- | 8 | -- | -- | -- | -- |
| 9q | 7 and 11 | -- | -- | 28 | -- | -- | -- | -- | -- | -- | -- | -- |
| 9r | 7 | -- | -- | 1 | 1 | -- | -- | -- | -- | -- | -- | -- |
| 9s | 11 | -- | -- | 4 | -- | -- | -- | -- | -- | -- | -- | -- |
| 9t | 11 | -- | -- | 1 | -- | -- | -- | -- | -- | -- | -- | -- |
| 9u | 10 | -- | -- | 2 | -- | -- | -- | -- | -- | -- | -- | -- |
| 9v | 11 | -- | -- | 1 | -- | -- | -- | -- | -- | -- | -- | -- |
| 9w | 11* | -- | -- | 2 | -- | -- | -- | -- | -- | -- | -- | -- |
| 9x | 5 | -- | -- | -- | -- | 2 | -- | -- | -- | -- | -- | -- |
| 9z | -- | -- | -- | 1 | -- | -- | -- | -- | -- | -- | -- | -- |
| STR haplotype | SNP haplotype | Bali | Brunei | Iran | Thailand | Taiwan | Philippines | Israeli Saluki | Dingo | Breed | Published Breeda | Wolf |
| n1 | 1/2/3/4 | -- | -- | -- | -- | -- | -- | -- | -- | 1 | -- | -- |
| n10 | 11 | -- | -- | -- | -- | -- | -- | -- | -- | 4 | -- | -- |
| n13 | 6 | -- | -- | -- | -- | -- | -- | -- | -- | 1 | -- | -- |
| n14 | 1/2/3/4 | -- | -- | -- | -- | -- | -- | -- | -- | 4 | -- | -- |
| n2 | 1/2/3/4 | -- | -- | -- | -- | -- | -- | -- | -- | 1 | -- | -- |
| n3 | 1/2/3/4 | -- | -- | -- | -- | -- | -- | -- | -- | 1 | -- | -- |
| n4 | 1/2/3/4 | -- | -- | -- | -- | -- | -- | -- | -- | 1 | -- | -- |
| n7 | 1/2/3/4 | -- | -- | -- | -- | -- | -- | -- | -- | 1 | -- | -- |
| n8 | 1/2/3/4 | -- | -- | -- | -- | -- | -- | -- | -- | 3 | -- | -- |
| n9 | 11 | -- | -- | -- | -- | -- | -- | -- | -- | 3 | -- | -- |
| Total | n/a | 71 | 21 | 136 | 31 | 20 | 16 | 31 | 5 | 95 | 818 | 7 |

aBannasch D, Bannasch M, Ryun J, Famula T, Pedersen N (2005). Y chromosome haplotype analysis in purebred dogs. Mamm Genome 16: 273-280. Note: SNP haplotypes were not determined for these published breed samples and when recorded on the same row indicate the SNP haplotype corresponding to a different sample with the same STR haplotype.
